# Supplementary material for: Community Composition, Antifungal Activity and Chemical Analyses of Ant-Derived Actinobacteria
Source: PubMed Central journal article supplement (PMC7026373; doi:10.3389/fmicb.2020.00201), 2020-02-11
Supplement: Data_Sheet_1.pdf [file Data_Sheet_1.pdf]

Supporting information

## **Community Composition, Antifungal Activity and Chemical Analyses of Ant-derived Actinobacteria**

**Zhiyan Wang<sup>1,2†</sup>, Zhiyin Yu<sup>1,2†</sup>, Junwei Zhao<sup>1†</sup>, Xiaoxin Zhuang<sup>1</sup>, Peng Cao<sup>1</sup>, Chongxi Liu<sup>1,2\*</sup>, Wensheng Xiang<sup>1,3\*</sup>**

<sup>1</sup>Key Laboratory of Agricultural Microbiology of Heilongjiang Province, Northeast Agricultural University, Harbin 150030, China

<sup>2</sup>State Key Laboratory of Phytochemistry and Plant Resources in West China, Kunming Institute of Botany, Chinese Academy of Sciences, Kunming 650201, China

<sup>3</sup>State Key Laboratory for Biology of Plant Diseases and Insect Pests, Institute of Plant Protection, Chinese Academy of Agricultural Sciences, Beijing 100193, China

\*Correspondence: Chongxi Liu and Wensheng Xiang

E-mail: [xizi-ok@163.com](mailto:xizi-ok@163.com), [xiangwensheng@neau.edu.cn](mailto:xiangwensheng@neau.edu.cn)

†These authors have contributed equally to this work

**Running title: “Actinobacteria from Ants”**

**Table S1** Taxonomic distribution of ant-derived actinobacterial isolates from different nests, body parts and isolation media.

| Isolate   | Closest Type Strain and Similarity             | Nest    | Body Part             | Medium                    |
|-----------|------------------------------------------------|---------|-----------------------|---------------------------|
| 1H-GS3    | <i>Streptomyces ossamyceticus</i> (99.9%)      | 1, 5    | Head, Cuticle         | GS, TWYE                  |
| 1H-SSA4   | <i>Streptomyces ossamyceticus</i> (98.6%)      | 1       | Head                  | SSA                       |
| 1H-TWYE36 | <i>Streptomyces stelliscabiei</i> (98.6%)      | 1       | Head                  | TWYE                      |
| 1H-CA9    | <i>Streptomyces scabiei</i> (99.7%)            | 1, 4    | Head, Thorax          | CA, XA                    |
| 1C-GS8    | <i>Streptomyces phaeochromogenes</i> (99.2%)   | 1, 3    | Cuticle, Head, Thorax | GS, HV, CA, SSA           |
| 1H-SSA6   | <i>Streptomyces rectiviolaceus</i> (99.9%)     | 1       | Head                  | SSA                       |
| 1H-SSA8   | <i>Streptomyces ramulosus</i> (99.2%)          | 1       | Head                  | SSA                       |
| 1H-TWYE2  | <i>Streptomyces durmitorensis</i> (99.7%)      | 1, 3    | Head                  | TWYE, GS                  |
| 1C-CA1    | <i>Streptomyces resistomycificus</i> (100%)    | 1       | Cuticle               | CA                        |
| 1C-TWYE2  | <i>Streptomyces xanthophaeus</i> (99.9%)       | 1       | Cuticle, Head         | TWYE, CA                  |
| 1H-TWYE12 | <i>Streptomyces colombiensis</i> (99.8%)       | 1       | Head                  | TWYE                      |
| 1H-GS2    | <i>Streptomyces candidus</i> (99.4%)           | 1       | Head                  | GS                        |
| 1H-SSA34  | <i>Streptomyces spiroverticillatus</i> (99.3%) | 1, 2, 5 | Head, Cuticle         | SSA, HV, XA, TWYE, CA, GS |
| 1C-CA4    | <i>Streptomyces fulvissimus</i> (99.9%)        | 1       | Cuticle               | CA                        |
| 1C-GS11   | <i>Streptomyces puniceus</i> (99.9%)           | 1       | Cuticle               | GS                        |
| 1H-GS12   | <i>Streptomyces globisporus</i> (99.9%)        | 1       | Head                  | GS                        |
| 1H-TWYE23 | <i>Streptomyces gardneri</i> (99.6%)           | 1, 3, 4 | Head, Cuticle, Gaster | TWYE, GS, CA              |
| 1H-GS9    | <i>Streptomyces scopuliridis</i> (98.8%)       | 1       | Head                  | GS                        |
| 1H-XA2    | <i>Streptomyces netropsis</i> (99.7%)          | 1       | Head                  | XA                        |
| 1C-XA2    | <i>Streptomyces netropsis</i> (99.7%)          | 1       | Cuticle               | XA                        |

|            |                                                        |                     |               |                            |                      |
|------------|--------------------------------------------------------|---------------------|---------------|----------------------------|----------------------|
| 1C-GS3-1   | <i>Streptomyces</i><br>(99.7%)                         | <i>sioyaensis</i>   | 1, 5          | Cuticle, Head              | GS, SSA, HV,<br>TWYE |
| 1C-HV8     | <i>Streptomyces</i><br>(99.9%)                         | <i>sioyaensis</i>   | 1, 2, 4       | Cuticle, Thorax,<br>Gaster | HV, CA, GS           |
| 1H-GS14    | <i>Streptomyces</i><br>(99.6%)                         | <i>sioyaensis</i>   | 1             | Head                       | GS                   |
| 1G-GS1     | <i>Streptomyces</i><br>(99.8%)                         | <i>nigrescens</i>   | 1, 2          | Gaster, Head               | GS, HV               |
| 1H-TWYE7   | <i>Streptomyces</i><br>(99.9%)                         | <i>nigrescens</i>   | 1             | Head                       | TWYE                 |
| 1H-SSA3    | <i>Streptomyces</i><br><i>angustmyceticus</i> (99.7%)  |                     | 1             | Head, Gaster               | SSA, TWYE            |
| 1H-TWYE25  | <i>Streptomyces</i><br><i>angustmyceticus</i> (99.7%)  |                     | 1             | Head                       | TWYE                 |
| 1H-SSA5    | <i>Streptomyces</i><br><i>angustmyceticus</i> (99.9%)  |                     | 1             | Head                       | SSA, GS              |
| 1H-SSA14   | <i>Streptomyces</i><br>(100%)                          | <i>fradiae</i>      | 1             | Head                       | SSA                  |
| 1H-GS5     | <i>Streptomyces</i><br>(99.9%)                         | <i>spectabilis</i>  | 1             | Head                       | GS                   |
| 1H-TWYE14  | <i>Streptomyces</i><br>(99.4%)                         | <i>rubrogriseus</i> | 1             | Head                       | TWYE                 |
| 1H-TWYE10  | <i>Streptomyces rochei</i> (99.9%)                     |                     | 1             | Head                       | TWYE                 |
| 1H-TWYE30  | <i>Streptomyces</i><br>(99.9%)                         | <i>luteogriseus</i> | 1             | Head                       | TWYE                 |
| 1M-XA1     | <i>Streptomyces</i><br>(99.7%)                         | <i>albidoflavus</i> | 1, 2,<br>3, 4 | Thorax, Head,<br>Cuticle   | XA, CA, HV,<br>TWYE  |
| 1H-SSA5(2) | <i>Streptomyces</i><br>(99.7%)                         | <i>hyalinus</i>     | 1             | Head                       | SSA                  |
| 1C-HV13    | <i>Streptosporangium</i><br><i>nanhuense</i> (99.7%)   |                     | 1             | Cuticle                    | HV                   |
| 1C-HV12    | <i>Promicromonospora</i><br><i>kermanensis</i> (99.5%) |                     | 1             | Cuticle                    | HV                   |
| 1H-HV4     | <i>Nocardia</i><br>(97.4%)                             | <i>salmonicida</i>  | 1             | Head                       | HV                   |
| 1C-GS7     | <i>Verrucosispora</i><br><i>rhizosphaerae</i> (99.4%)  |                     | 1             | Cuticle                    | GS                   |
| 1C-CA6     | <i>Phytohabitans</i><br>(99.8%)                        | <i>houttuyniae</i>  | 1             | Cuticle                    | CA                   |
| 1G-HV2     | <i>Micromonospora</i><br>(99.7%)                       | <i>taraxaci</i>     | 1             | Gaster                     | HV                   |
| 2C-HV14    | <i>Streptomyces</i><br>(98.9%)                         | <i>deccanensis</i>  | 1, 2          | Cuticle, Head,<br>Gaster   | HV, SSA, CA,<br>GS   |
| 2M-TWYE1   | <i>Streptomyces</i>                                    | <i>ederensis</i>    | 2             | Thorax                     | TWYE                 |

---

|            |                                      |         |            |                               |                           |  |
|------------|--------------------------------------|---------|------------|-------------------------------|---------------------------|--|
|            | (99.2%)                              |         |            |                               |                           |  |
| 2C-SSA16-1 | <i>Streptomyces umbrinus</i>         |         | 2, 4, 5    | Cuticle, Head                 | SSA, GS, CA, HV           |  |
|            | (99.0%)                              |         |            |                               |                           |  |
| 2C-SSA7    | <i>Streptomyces tauricus</i>         |         | 2, 5       | Cuticle                       | SSA, GS, TWYE             |  |
|            | (99.5%)                              |         |            |                               |                           |  |
| 2H-SSA3    | <i>Streptomyces pseudovenezuelae</i> |         | 2          | Head                          | SSA                       |  |
|            | (99.1%)                              |         |            |                               |                           |  |
| 2M-CA2     | <i>Streptomyces fulvissimus</i>      |         | 2          | Thorax                        | CA                        |  |
|            | (99.9%)                              |         |            |                               |                           |  |
| 2H-HV12    | <i>Streptomyces tauricus</i>         |         | 1, 2, 4, 5 | Head, Cuticle, Thorax         | HV, CA, XA, SSA, GS, TWYE |  |
|            | (100%)                               |         |            |                               |                           |  |
| 2H-HV4     | <i>Streptomyces badius</i>           | (100%)  | 2, 5       | Head, Cuticle                 | HV, SSA                   |  |
| 2H-TWYE14  | <i>Streptomyces niveus</i>           | (99.4%) | 2, 4       | Head, Cuticle, Thorax, Gaster | TWYE, GS, SSA             |  |
|            |                                      |         |            |                               |                           |  |
| 2H-SSA16   | <i>Streptomyces albidoflavus</i>     |         | 1, 2       | Head, Cuticle                 | SSA                       |  |
|            | (99.9%)                              |         |            |                               |                           |  |
| 2C-HV3     | <i>Microbispora bryophytorum</i>     |         | 2          | Cuticle                       | HV                        |  |
|            | (99.9%)                              |         |            |                               |                           |  |
| 2M-SSA4    | <i>Nocardia salmonicida</i>          |         | 2          | Thorax                        | SSA                       |  |
|            | (99.1%)                              |         |            |                               |                           |  |
| 2C-HV13    | <i>Micromonospora taraxaci</i>       |         | 2, 4       | Cuticle, Head                 | HV, TWYE                  |  |
|            | (99.9%)                              |         |            |                               |                           |  |
| 2M-SSA2    | <i>Micromonospora inaquosa</i>       |         | 2, 3       | Thorax, Cuticle               | SSA, TWYE                 |  |
|            | (99.9%)                              |         |            |                               |                           |  |
| 2C-HV13-1  | <i>Micromonospora taraxaci</i>       |         | 2          | Cuticle                       | HV                        |  |
|            | (99.9%)                              |         |            |                               |                           |  |
| 2C-SSA2    | <i>Micromonospora taraxaci</i>       |         | 2          | Cuticle                       | SSA                       |  |
|            | (99.9%)                              |         |            |                               |                           |  |
| 2C-CA12    | <i>Micromonospora taraxaci</i>       |         | 2          | Cuticle                       | CA                        |  |
|            | (99.9%)                              |         |            |                               |                           |  |
| 2G-CA3     | <i>Micromonospora taraxaci</i>       |         | 2          | Gaster                        | CA                        |  |
|            | (99.7%)                              |         |            |                               |                           |  |
| 2C-HV12    | <i>Micromonospora taraxaci</i>       |         | 2          | Cuticle                       | HV                        |  |
|            | (99.4%)                              |         |            |                               |                           |  |
| 3H-XA8     | <i>Streptomyces fulvissimus</i>      |         | 3          | Head, Thorax                  | XA, SSA, TWYE             |  |
|            | (99.6%)                              |         |            |                               |                           |  |
| 3H-GS5     | <i>Streptomyces fulvissimus</i>      |         | 3          | Head                          | GS, HV                    |  |
|            | (100%)                               |         |            |                               |                           |  |
| 3H-HV17(1) | <i>Streptomyces setonii</i>          |         | 3, 4, 5    | Head, Cuticle                 | HV, XA, GS                |  |
|            | (99.9%)                              |         |            |                               |                           |  |
| 3H-HV6     | <i>Streptomyces puniceus</i>         |         | 2, 3       | Head, Gaster                  | HV, CA                    |  |
|            | (99.9%)                              |         |            |                               |                           |  |
| 3H-HV1     | <i>Streptomyces puniceus</i>         |         | 3          | Head                          | HV, GS                    |  |
|            | (99.9%)                              |         |            |                               |                           |  |

---

|            |                                                  |            |                       |                  |
|------------|--------------------------------------------------|------------|-----------------------|------------------|
| 3C-HV2     | <i>Streptomyces puniceus</i><br>(99.2%)          | 3          | Cuticle, Head, Thorax | HV, GS, XA       |
| 3H-TWYE2   | <i>Streptomyces tanashiensis</i><br>(99.4%)      | 3, 4       | Head, Thorax, Gaster  | TWYE, GS, HV     |
| 3C-SSA1    | <i>Streptomyces sporoclivatus</i><br>(99.9%)     | 3, 5       | Cuticle, Head         | SSA, GS          |
| 3H-HV17(2) | <i>Streptomyces gougerotii</i><br>(98.8%)        | 3          | Head                  | HV               |
| 3H-CA8     | <i>Streptomyces rochei</i> (100%)                | 1, 3, 5    | Head, Cuticle         | CA, XA, TWYE     |
| 3H-GS17    | <i>Actinocorallia glomerata</i><br>(98.0%)       | 3          | Head                  | GS, TWYE         |
| 3C-HV12    | <i>Nocardia salmonicida</i><br>(99.2%)           | 3          | Cuticle               | HV               |
| 3C-CA11    | <i>Micromonospora tulbaghiae</i><br>(99.9%)      | 3          | Cuticle, Thorax       | CA, SSA          |
| 3H-HV25    | <i>Micromonospora chalcea</i><br>(99.3%)         | 3, 5       | Head                  | HV, GS           |
| 3C-HV5     | <i>Micromonospora auratinigra</i> (99.2%)        | 3, 5       | Cuticle, Gaster       | HV, TWYE, CA     |
| 3C-HV4     | <i>Micromonospora taraxaci</i><br>(99.2%)        | 3          | Cuticle               | HV               |
| 3C-GS13-1  | <i>Micromonospora taraxaci</i><br>(99.6%)        | 1, 2, 3, 5 | Cuticle               | GS, TWYE, CA, HV |
| 4G-GS2     | <i>Streptomyces ossamyceticus</i><br>(100%)      | 4, 5       | Head, Thorax, Gaster  | GS, HV, SSA      |
| 4H-CA5     | <i>Streptomyces rhizosphaerihabitans</i> (99.6%) | 2, 4, 5    | Head, Cuticle         | CA, XA           |
| 4M-GS2     | <i>Streptomyces seoulensis</i><br>(99.5%)        | 1, 4       | Thorax, Cuticle       | GS, XA           |
| 4G-TWYE2   | <i>Streptomyces seoulensis</i><br>(99.5%)        | 2, 4, 5    | Head, Cuticle, Gaster | TWYE, SSA, GS    |
| 4M-GS8     | <i>Streptomyces cirratus</i><br>(99.9%)          | 4          | Thorax                | GS               |
| 4H-TWYE9   | <i>Streptomyces neopeptinius</i><br>(99.0%)      | 4          | Head                  | TWYE             |
| 4M-CA7     | <i>Micromonospora rifamycinica</i> (99.7%)       | 1, 4       | Thorax, Head          | CA, GS           |
| 5C-GS1     | <i>Streptomyces ossamyceticus</i><br>(99.9%)     | 3, 5       | Cuticle, Head         | GS, TWYE         |
| 5C-GS15    | <i>Streptomyces ossamyceticus</i><br>(99.9%)     | 5          | Cuticle               | GS               |
| 5C-TWYE6   | <i>Streptomyces cinereoruber</i><br>(99.6%)      | 5          | Cuticle               | TWYE, SSA        |
| 5H-XA1     | <i>Streptomyces rectiviolaecus</i>               | 5          | Head                  | XA               |

---

|           |                                      |            |                       |                 |  |
|-----------|--------------------------------------|------------|-----------------------|-----------------|--|
|           | (99.9%)                              |            |                       |                 |  |
| 5H-CA1    | <i>Streptomyces tauricus</i>         | 2, 5       | Head, Cuticle         | CA, SSA, GS     |  |
|           | (99.9%)                              |            |                       |                 |  |
| 5C-HV24   | <i>Streptomyces pseudovenezuelae</i> | 5          | Cuticle               | HV, SSA         |  |
|           | (99.2%)                              |            |                       |                 |  |
| 5C-TWYE20 | <i>Streptomyces canus</i>            | 5          | Cuticle               | TWYE, GS, XA    |  |
|           | (99.7%)                              |            |                       |                 |  |
| 5H-CA17   | <i>Streptomyces xanthophaeus</i>     | 1, 2, 3, 5 | Head, Cuticle, Thorax | CA, GS, XA, SSA |  |
|           | (99.9%)                              |            |                       |                 |  |
| 5H-CA12   | <i>Streptomyces xanthophaeus</i>     | 5          | Head, Cuticle         | CA, HV          |  |
|           | (99.9%)                              |            |                       |                 |  |
| 5H-HV13   | <i>Streptomyces cirratus</i>         | 5          | Head                  | HV              |  |
|           | (99.9%)                              |            |                       |                 |  |
| 5H-HV6    | <i>Streptomyces netropsis</i>        | 5          | Head                  | HV              |  |
|           | (99.9%)                              |            |                       |                 |  |
| 5H-GS10   | <i>Streptomyces angustmyceticus</i>  | 2, 5       | Head                  | GS, SSA         |  |
|           | (99.7%)                              |            |                       |                 |  |
| 5C-SSA2   | <i>Streptomyces angustmyceticus</i>  | 4, 5       | Cuticle               | SSA, XA         |  |
|           | (99.7%)                              |            |                       |                 |  |
| 5H-HV14   | <i>Streptomyces angustmyceticus</i>  | 1, 5       | Head                  | HV, CA          |  |
|           | (99.7%)                              |            |                       |                 |  |
| 5H-XA2    | <i>Streptomyces angustmyceticus</i>  | 5          | Head                  | XA              |  |
|           | (99.7%)                              |            |                       |                 |  |
| 5H-CA11   | <i>Streptomyces hyalinus</i>         | 5          | Head                  | CA              |  |
|           | (98.9%)                              |            |                       |                 |  |
| 5C-SSA15  | <i>Nonomuraea guangzhouensis</i>     | 5          | Cuticle               | SSA             |  |
|           | (99.7%)                              |            |                       |                 |  |
| 5C-CA9    | <i>Micromonospora inositola</i>      | 5          | Cuticle               | CA              |  |
|           | (99.5%)                              |            |                       |                 |  |
| 5G-GS1    | <i>Micromonospora rifamycinica</i>   | 5          | Gaster                | GS              |  |
|           | (99.9%)                              |            |                       |                 |  |
| 5C-CA12   | <i>Micromonospora rifamycinica</i>   | 5          | Cuticle               | CA              |  |
|           | (99.9%)                              |            |                       |                 |  |
| 5C-CA4    | <i>Micromonospora carbonacea</i>     | 5          | Cuticle               | CA              |  |
|           | (99.8%)                              |            |                       |                 |  |
| 5C-GS5    | <i>Micromonospora taraxaci</i>       | 5          | Cuticle               | GS              |  |
|           | (99.9%)                              |            |                       |                 |  |
| 5C-HV20   | <i>Streptomyces glauciniger</i>      | 5          | Cuticle               | HV              |  |
|           | (99.9%)                              |            |                       |                 |  |

---

**Table S2.** The relative abundance of OTUs at phylum level.

| <b>Phylum</b>           | <b>Relative abundance (%)</b> |
|-------------------------|-------------------------------|
| <i>Proteobacteria</i>   | 96.30                         |
| <i>Actinobacteria</i>   | 2.81                          |
| <i>Firmicutes</i>       | 0.26                          |
| <i>Chloroflexi</i>      | 0.17                          |
| <i>Gemmatimonadetes</i> | 0.13                          |
| <i>Acidobacteria</i>    | 0.13                          |
| <i>Planctomycetes</i>   | 0.062                         |
| <i>Verrucomicrobia</i>  | 0.057                         |
| <i>Cyanobacteria</i>    | 0.041                         |
| <i>Nitrospirae</i>      | 0.026                         |
| <i>Armatimonadetes</i>  | 0.0059                        |
| <i>Chlorobi</i>         | 0.0051                        |
| <i>Tenericutes</i>      | 0.0034                        |
| <i>Chlamydiae</i>       | 0.0034                        |
| <i>Fibrobacteres</i>    | 0.0017                        |
| <i>Bacteroidetes</i>    | 0.00084                       |

**Table S3.** The relative abundance of OTUs at family level from the phylum *Actinobacteria*

| <b>Family</b>                | <b>Relative abundance (%)</b> |
|------------------------------|-------------------------------|
| <i>Nocardioideaceae</i>      | 15.67                         |
| <i>Nocardiaceae</i>          | 12.54                         |
| <i>Dermacoccaceae</i>        | 7.61                          |
| <i>Intrasporangiaceae</i>    | 7.08                          |
| <i>Streptomycetaceae</i>     | 6.59                          |
| <i>Mycobacteriaceae</i>      | 6.25                          |
| <i>Micrococcaceae</i>        | 5.57                          |
| <i>Gaiellaceae</i>           | 5.46                          |
| <i>Thermomonosporaceae</i>   | 4.86                          |
| <i>Microbacteriaceae</i>     | 3.95                          |
| <i>Propionibacteriaceae</i>  | 3.65                          |
| <i>Micromonosporaceae</i>    | 3.58                          |
| <i>Pseudonocardiaceae</i>    | 3.05                          |
| <i>Geodermatophilaceae</i>   | 2.79                          |
| <i>Sporichthyaceae</i>       | 1.81                          |
| <i>Tsukamurellaceae</i>      | 1.47                          |
| <i>Cellulomonadaceae</i>     | 1.28                          |
| <i>Patulibacteraceae</i>     | 1.17                          |
| <i>Streptosporangiaceae</i>  | 0.87                          |
| <i>Nakamurellaceae</i>       | 0.83                          |
| <i>Gordoniaceae</i>          | 0.64                          |
| <i>Corynebacteriaceae</i>    | 0.53                          |
| <i>Rubrobacteraceae</i>      | 0.49                          |
| <i>Kineosporiaceae</i>       | 0.45                          |
| <i>Nocardiopsaceae</i>       | 0.34                          |
| <i>Actinosynnemataceae</i>   | 0.30                          |
| <i>Bogoriellaceae</i>        | 0.23                          |
| <i>Solirubrobacteraceae</i>  | 0.23                          |
| <i>Frankiaceae</i>           | 0.15                          |
| <i>Promicromonosporaceae</i> | 0.11                          |
| <i>Iamiaceae</i>             | 0.075                         |
| <i>Sanguibacteraceae</i>     | 0.075                         |
| <i>Microthrixaceae</i>       | 0.038                         |
| <i>Brevibacteriaceae</i>     | 0.038                         |
| <i>Dietziaceae</i>           | 0.038                         |
| <i>Nitriliruptoraceae</i>    | 0.038                         |
| <i>Dermabacteraceae</i>      | 0.038                         |
| <i>Coriobacteriaceae</i>     | 0.038                         |
| <i>Euzebyaceae</i>           | 0.038                         |
| <i>Conexibacteraceae</i>     | 0.038                         |



## FIGURE CAPTIONS

**Figure S1.**  $^1\text{H}$ -NMR,  $^{13}\text{C}$ -NMR,  $^1\text{H}$ - $^1\text{H}$  COSY, HSQC, HMBC and HRESI spectra of compound **1**. (a)  $^1\text{H}$ -NMR (400 MHz) spectrum in  $\text{DMSO-}d_6$ ; (b)  $^{13}\text{C}$ -NMR (100 MHz) spectrum in  $\text{DMSO-}d_6$ ; (c)  $^1\text{H}$ - $^1\text{H}$  COSY (400 MHz) spectrum in  $\text{DMSO-}d_6$ ; (d) HSQC (400 MHz) spectrum in  $\text{DMSO-}d_6$ ; (e) HMBC (400 MHz) spectrum in  $\text{DMSO-}d_6$ ; (f) HRESI spectrum.

**Figure S2.**  $^1\text{H}$ -NMR,  $^{13}\text{C}$ -NMR and ESI spectra of compound **2** and **3**. (a)  $^1\text{H}$ -NMR (400 MHz) spectrum of compound **2** in  $\text{DMSO-}d_6$ ; (b)  $^{13}\text{C}$ -NMR (400 MHz) spectrum of compound **2** in  $\text{DMSO-}d_6$ ; (c)  $\text{ESI}^+$  spectrum of compound **2**; (d)  $^1\text{H}$ -NMR (400 MHz) spectrum of compound **3** in  $\text{DMSO-}d_6$ ; (e)  $^{13}\text{C}$ -NMR (400 MHz) spectrum of compound **3** in  $\text{DMSO-}d_6$ ; (f)  $\text{ESI}^+$  spectrum of compound **3**.

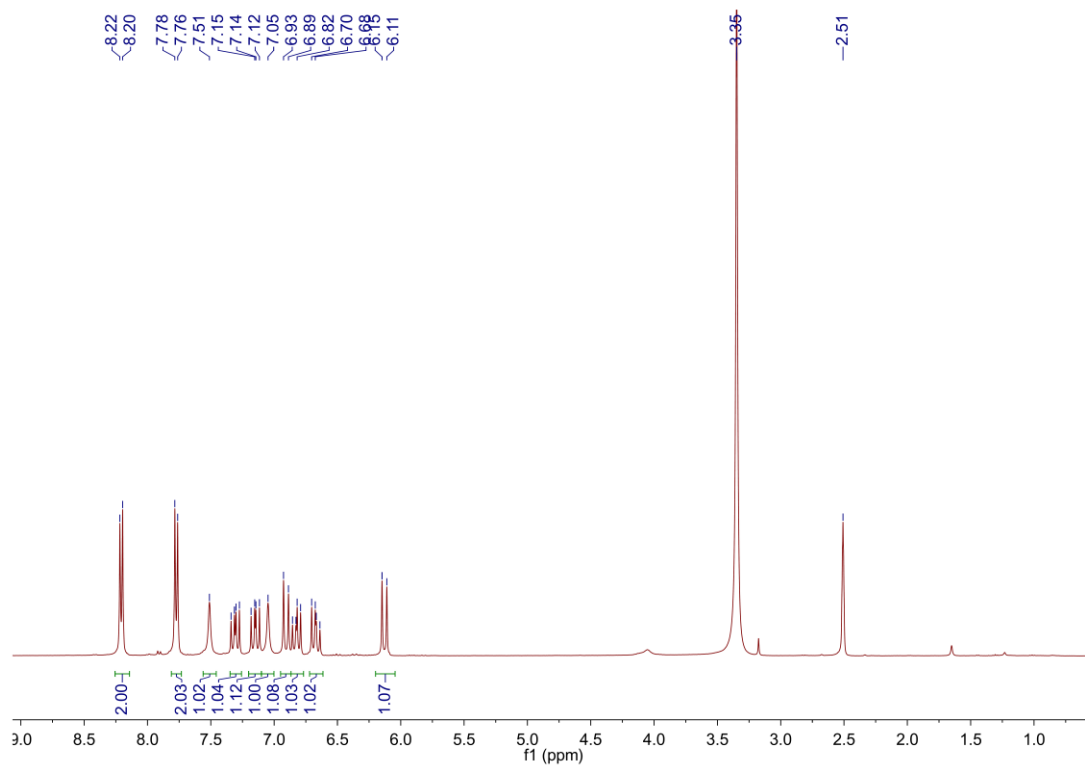

Figure S1a

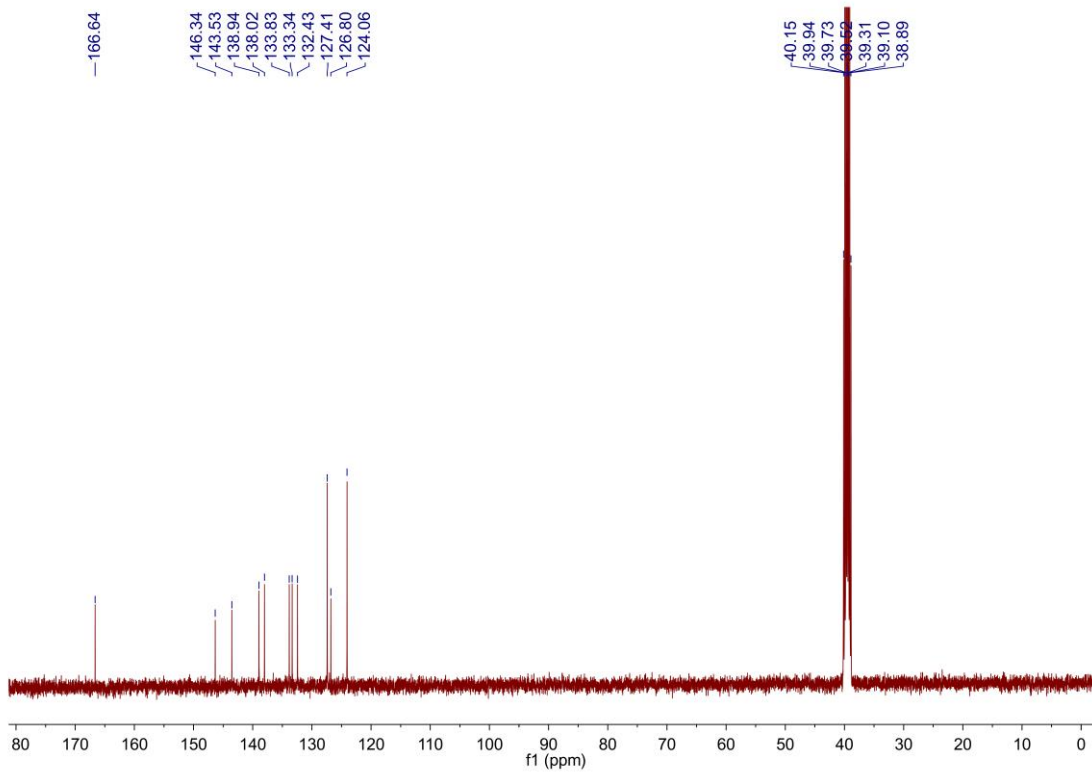

Figure S1b

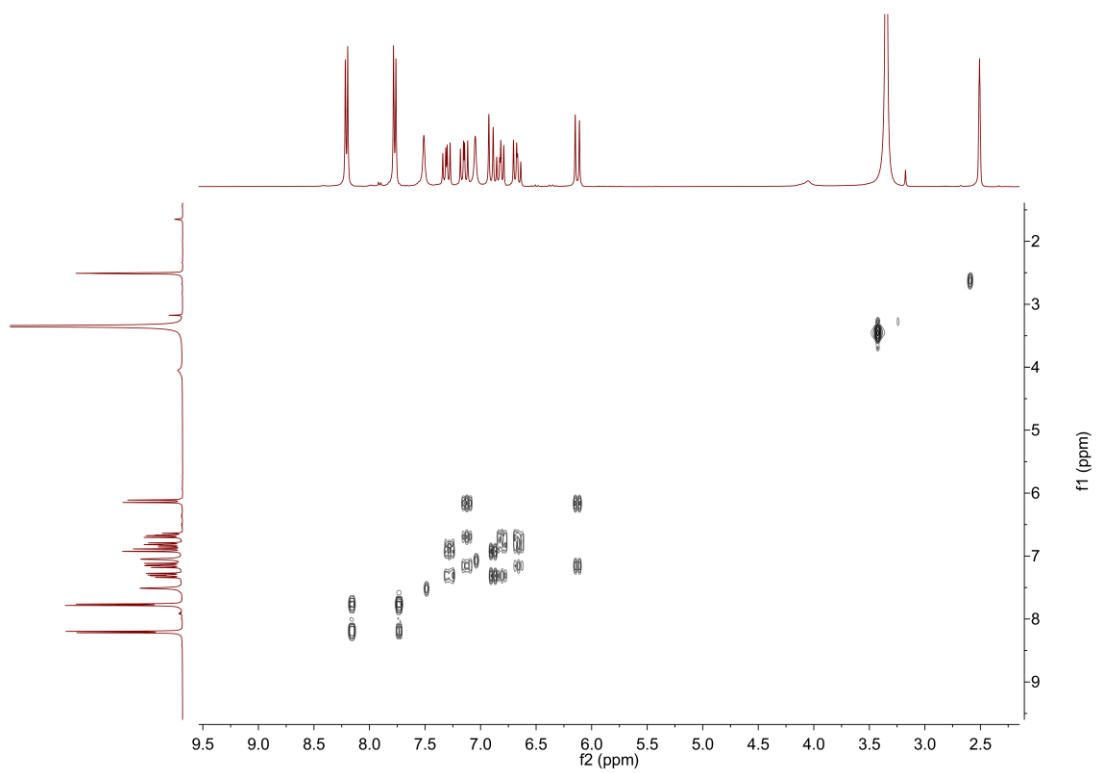

Figure S1c

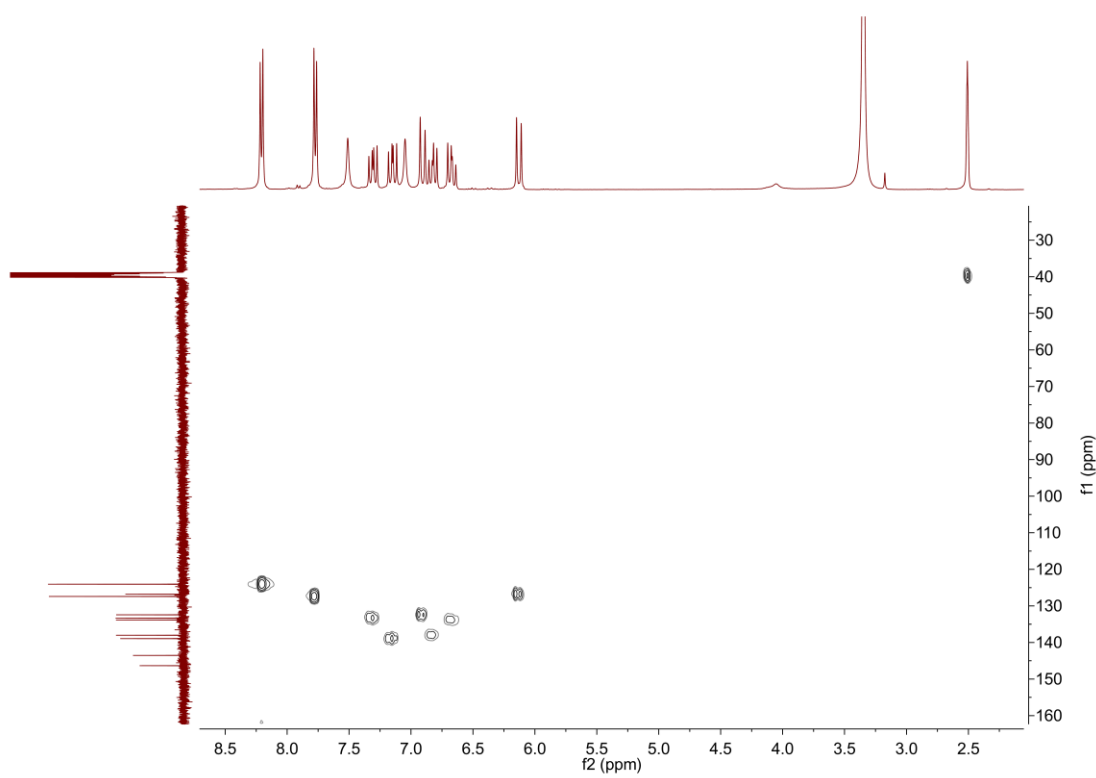

Figure S1d

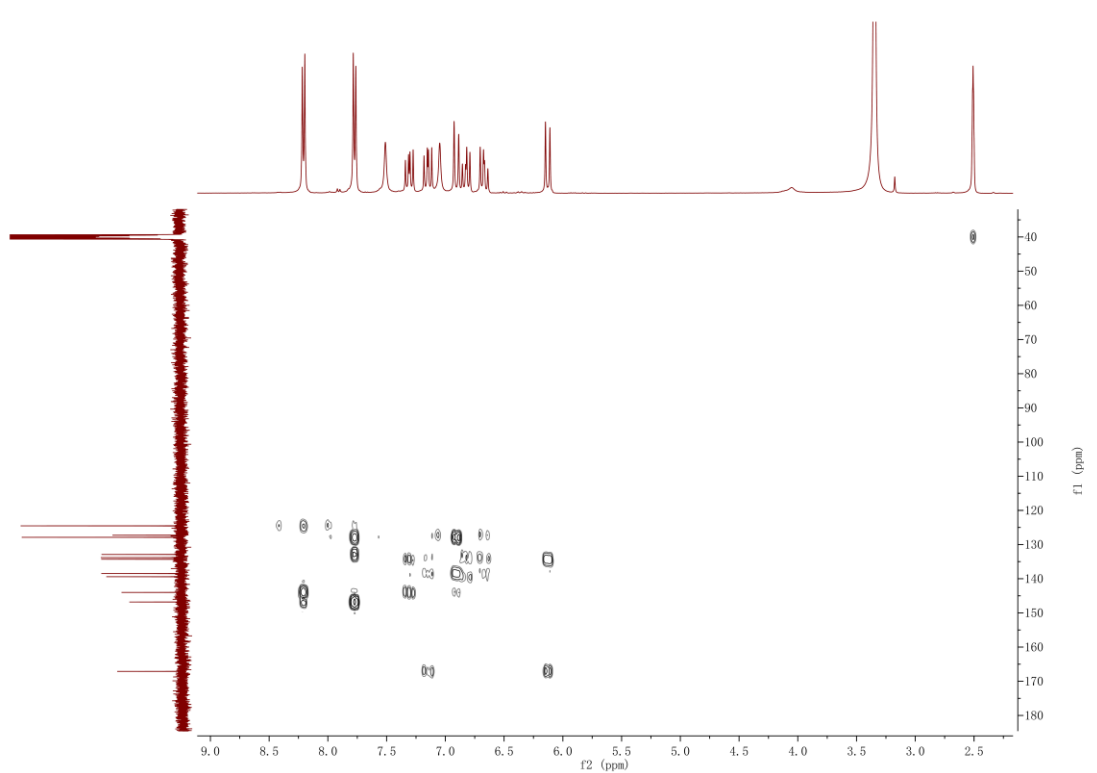

**Figure S1e**

Data File: E:\DATA\2018\1213\HSXC909.lcd

| Elmt | Val. | Min | Max | Elmt | Val. | Min | Max | Elmt | Val. | Min | Max | Elmt | Val. | Min | Max | Use Adduct |
|------|------|-----|-----|------|------|-----|-----|------|------|-----|-----|------|------|-----|-----|------------|
| H    | 1    | 10  | 100 | F    | 1    | 0   | 0   | S    | 2    | 0   | 0   | Ag   | 1    | 0   | 0   | Na         |
| C    | 4    | 10  | 100 | Na   | 1    | 0   | 0   | Cl   | 1    | 0   | 0   | I    | 3    | 0   | 0   |            |
| N    | 3    | 0   | 20  | Mg   | 2    | 0   | 0   | Se   | 2    | 0   | 0   |      |      |     |     |            |
| O    | 2    | 0   | 10  | Si   | 4    | 0   | 0   | Br   | 1    | 0   | 0   |      |      |     |     |            |

Error Margin (ppm): 5  
 HC Ratio: unlimited  
 Max Isotopes: all  
 MSn Iso RI (%): 75.00

DBE Range: -2.0 - 100.0  
 Apply N Rule: yes  
 Isotope RI (%): 1.00  
 MSn Logic Mode: OR

Electron Ions: both  
 Use MSn Info: yes  
 Isotope Res: 10000  
 Max Results: 10

Event#: 1 MS(E+) Ret. Time : 0.373 -> 0.387 Scan# : 57 -> 59

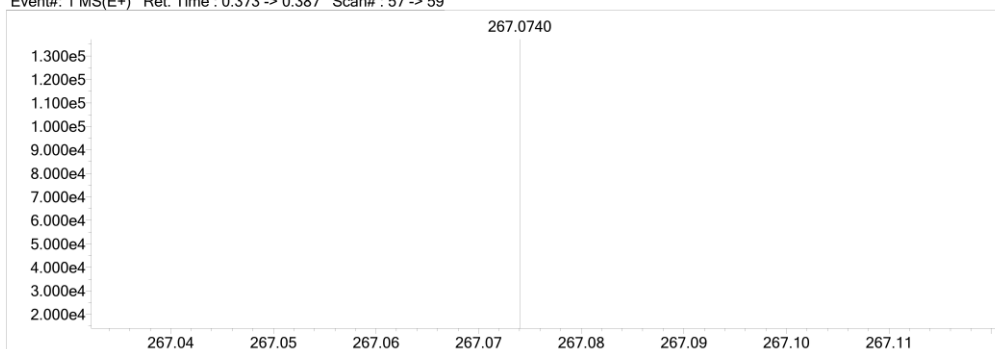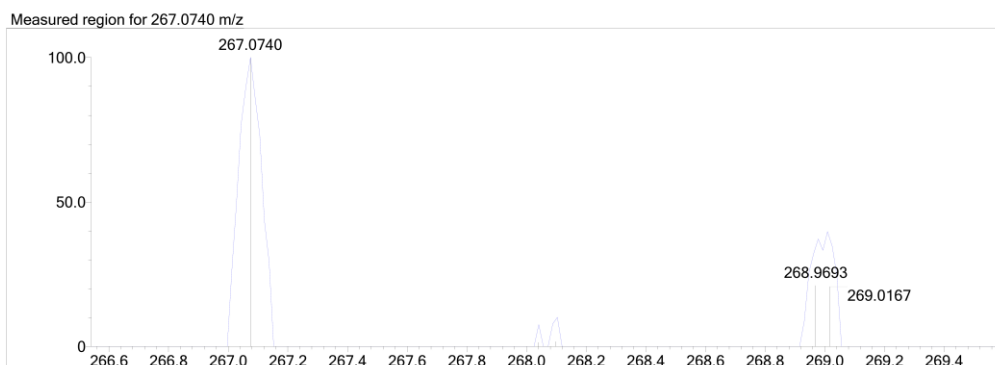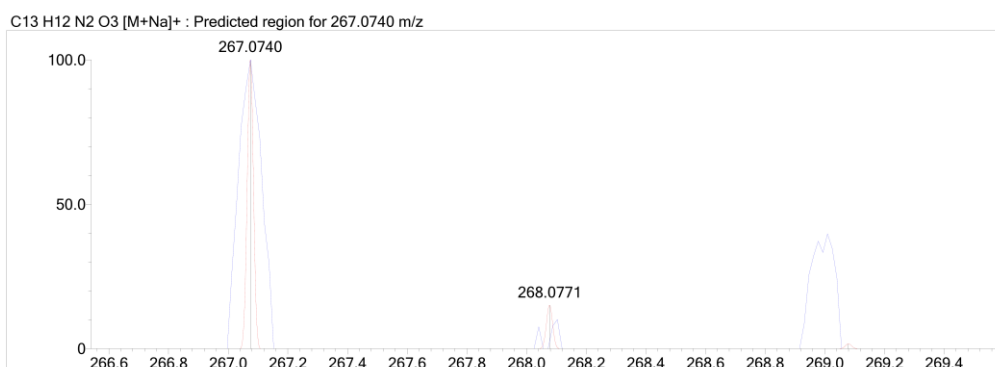

| Formula (M)   | Ion     | Meas. m/z | Pred. m/z | Df. (mDa) | Df. (ppm) | DBE |
|---------------|---------|-----------|-----------|-----------|-----------|-----|
| C13 H12 N2 O3 | [M+Na]+ | 267.0740  | 267.0740  | -0.0      | 0.00      | 9.0 |

Figure S1f

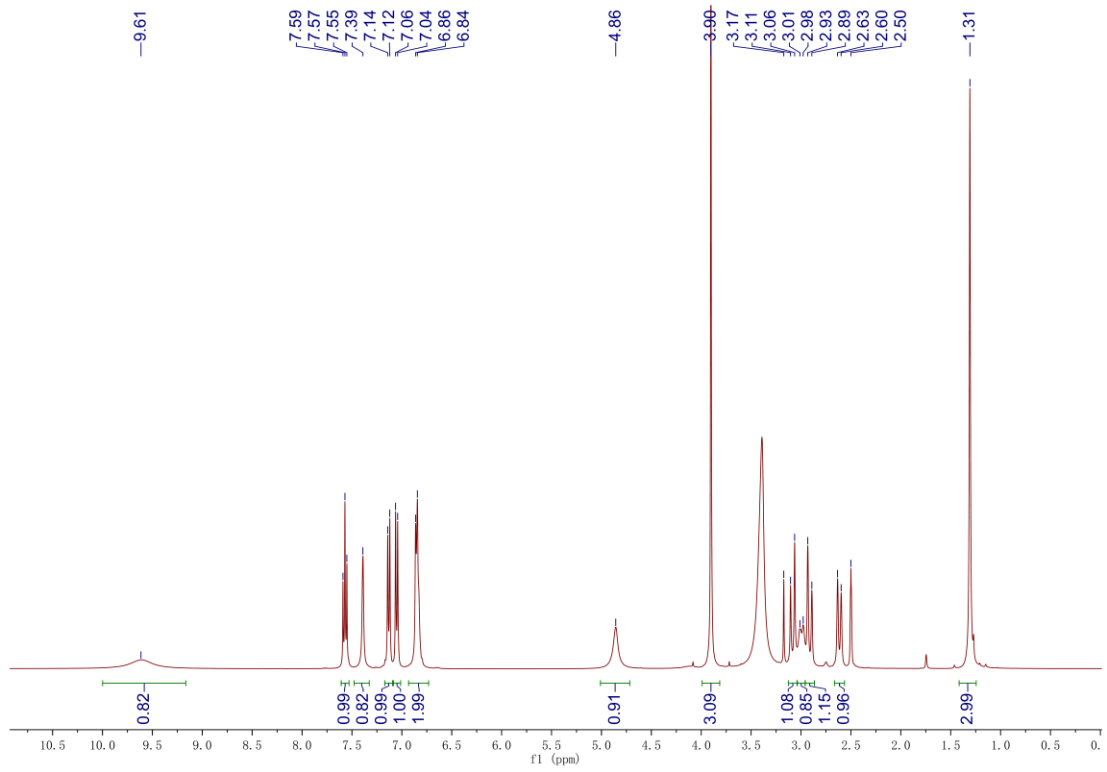

Figure S2a

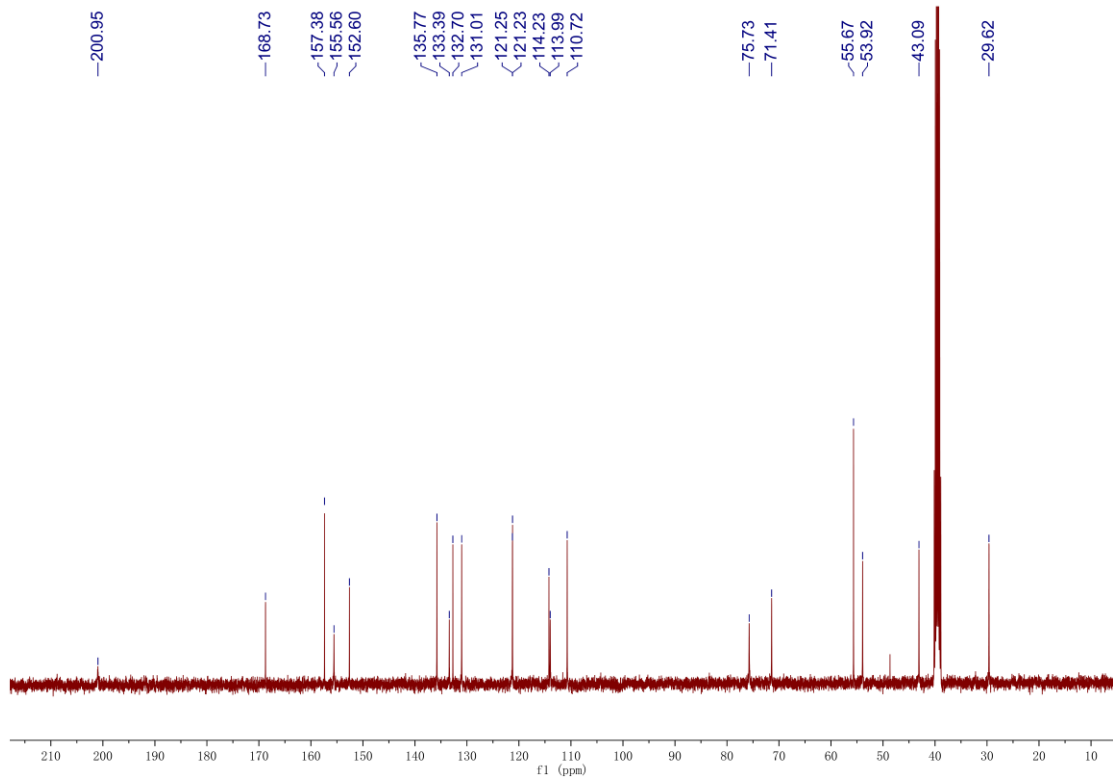

Figure S2b

==== LCMSsolution Data Report ====

|               |                      |                    |                            |
|---------------|----------------------|--------------------|----------------------------|
| Acquired by   | : Admin              | Sample Information | System Configuration       |
| Date Acquired | : 2018/6/28 10:22:03 |                    | <<Instrument>> : LC-IT-TOF |
| Sample Name   | : H5X399102          |                    |                            |
| Data File     | : H5X399102.lcd      |                    |                            |
| Method File   | : 阻尼管一级100-1500.lcm  |                    |                            |

<Spectrum>

Retention Time:0.413(Scan#:63)  
Spectrum:Averaged 0.373-0.453(57-69)  
Background:Averaged 0.000-0.324(1-49) MS Stage:MS Polarity:Pos Segment1 - Event1 Precursor:---- Cutoff:

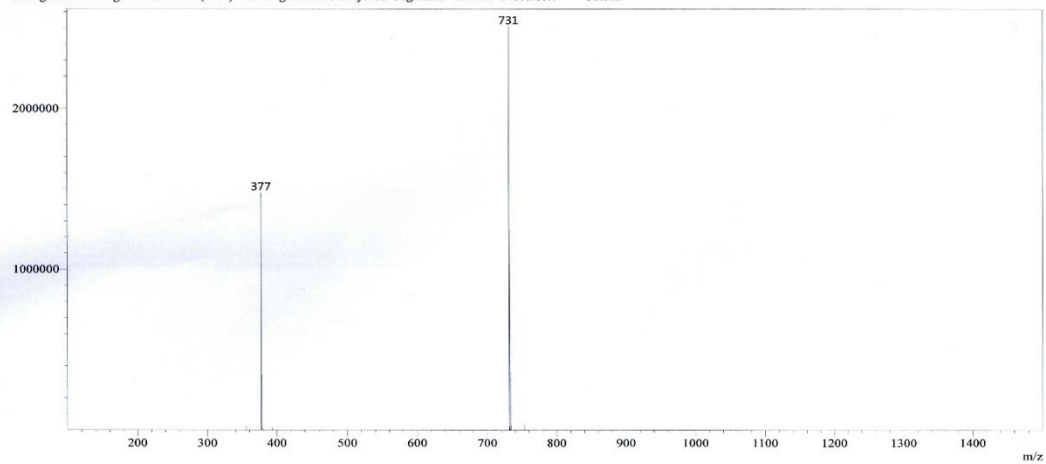

Figure S2c

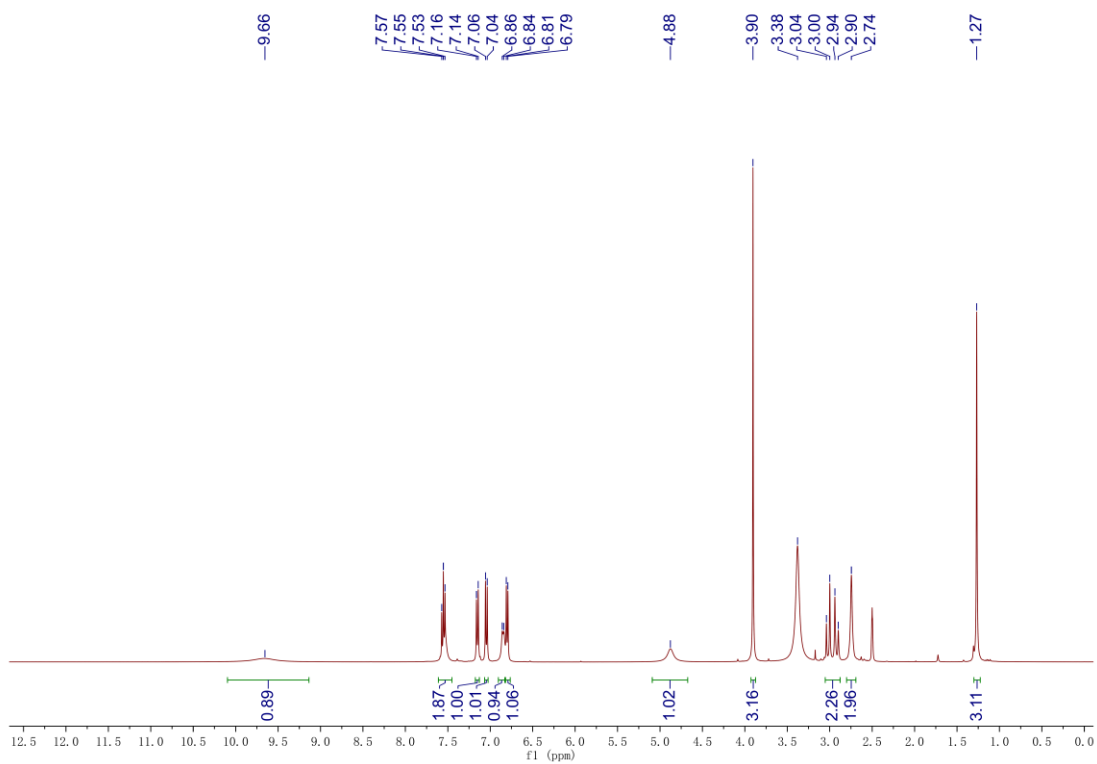

Figure S2d

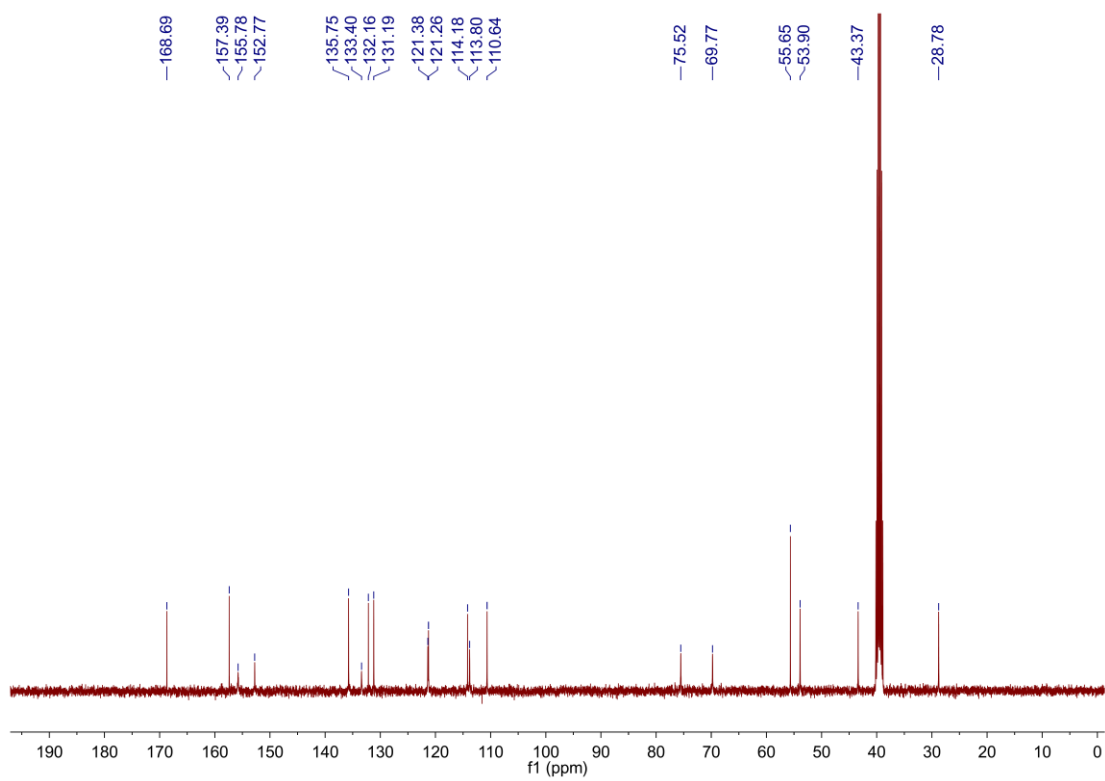

Figure S2e



==== LCMSsolution Data Report ====

Acquired by : Admin  
Date Acquired : 2018/6/28 10:23:39  
Sample Name : HSX399103  
Data File : HSX399103.lcd  
Method File : 阻尼管一级100-1500.lcm

Sample Information  
System Configuration  
<<Instrument>> : LC-IT-TOF

<Spectrum>

Retention Time:0.493(Scan#:76)  
Spectrum:Averaged 0.293-0.707(45-107)  
Background:Averaged 0.000-0.330(1-51) MS Stage:MS Polarity:Pos Segment1 - Event1 Precursor:---- Cutoff:

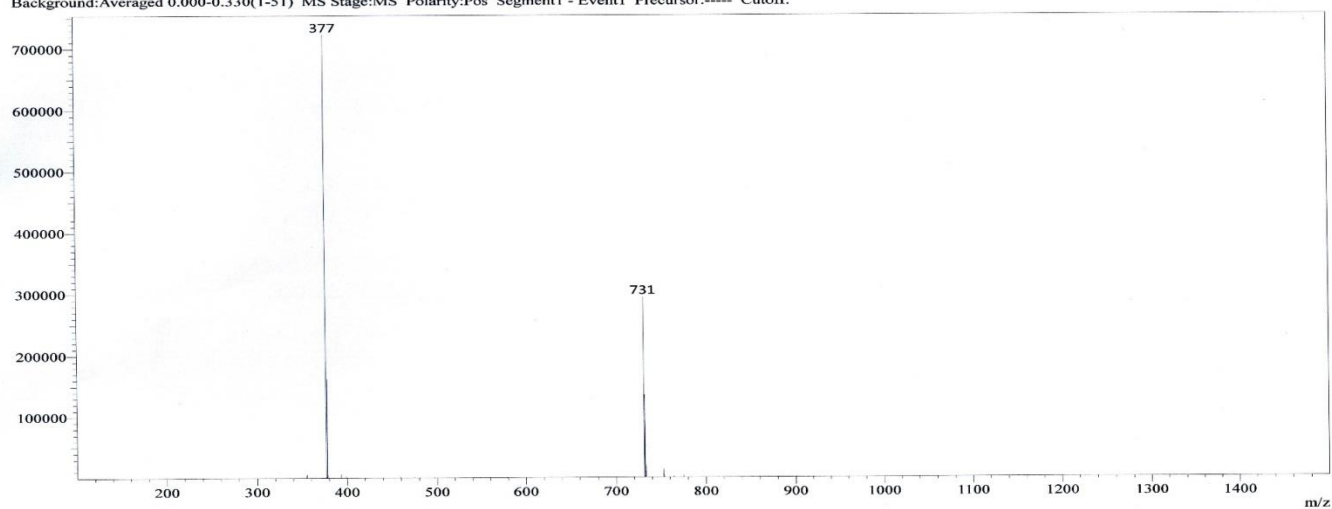

Figure S2f
